# Supplementary material for: Assessing the Viability of Translocated Mongolian Dung Beetles (<em>Gymnopleurus mopsus</em>) for Ecological Restoration in South Korea: An Analysis of Environmental Adaptability
Source: Preprints.org preprint supplement (doi:10.20944/preprints202410.0988.v1), 2024-10-15
Supplement: Supplementary file 1 [file supplementary]

## Sheet: 개체군 정보
		야외 소똥구리 모니터링(장소: 센터내 검역소)
		개체군 정보
			♀	♂	비고
		`19년 7월도입 7번 박스	4	5
		`19년 7월도입 8번 박스	4	5
		`19년 7월도입 9번 박스	4	5
		`19년 7월도입 10번 박스	4	5
			16	20
			36

## Sheet: 기상
	Month-Week	Minimum Temperature	Maximum Temperature	Mean Temperature	Mean Humidity	Precipitation	Soil Temperature	Soil Moisture Content
2019	November_Week_1	-2.846	16.847	6.65083	78.2491	7	-	-
2019	November_Week_2	-6.815	15.369	5.76573	73.8166	13.5	-	-
2019	November_Week_3	-7.393	17.466	4.5436	65.8148	9.5	7.2454	0.0454805
2019	November_Week_4	-3.14	12.512	4.66495	74.1961	12	8.2006	0.0462071
2019	December_Week_1	-11.73	6.893	-1.63726	55.5957	0.5	4.80435	0.0437768
2019	December_Week_2	-10.31	13.572	-0.94131	61.2722	0	3.07819	0.0399315
2019	December_Week_3	-7.491	11.446	0.165536	65.1327	0	3.70704	0.0374268
2019	December_Week_4	-9.826	8.298	-1.80888	64.4211	10	2.60921	0.033625
2020	January_Week_1	-9.998	7.171	-2.45225	61.8394	0	0.850089	0.027159
2020	January_Week_2	-7.458	10.225	0.505958	70.554	53.5	1.5708	0.024805
2020	January_Week_3	-10.978	7.473	-2.84348	59.2322	0	0.984417	0.020683
2020	January_Week_4	-8.909	9.192	1.44774	68.1897	8.5	1.70319	0.020921
2020	January_Week_5	-6.245	9.266	1.58808	70.647	39	3.33195	0.022182
2020	February_Week_1	-13.816	5.081	-3.03792	51.2265	0	1.15751	0.01918
2020	February_Week_2	-8.475	16.108	3.55386	69.0793	16.5	2.1258	0.020005
2020	February_Week_3	-9.348	14.986	0.559589	51.5708	0.5	1.65066	0.016109
2020	February_Week_4	-5.371	14.915	4.56069	69.2407	37.5	3.54359	0.022368
2020	March_Week_1	-9.179	19.131	3.33049	54.5587	0	4.02883	0.026101
2020	March_Week_2	-5.371	16.942	5.42673	54.9145	12	4.93047	0.027264
2020	March_Week_3	-3.436	24.417	7.78734	49.0939	0	5.53505	0.027316
2020	March_Week_4	-3.288	24.779	8.13625	71.2134	7.5	8.13517	0.043036
2020	April_Week_1	-3.853	23.309	8.27461	57.465	0	8.90328	0.062021
2020	April_Week_2	-4.545	21.036	8.31523	57.2029	12	9.24381	0.062334
2020	April_Week_3	-3.052	25.506	9.58359	68.863	30	10.7046	0.062189
2020	April_Week_4	-0.722	25.531	9.68681	49.6121	0.5	11.202	0.067839
2020	April_Week_5	0.476	33.399	16.1499	60.7754	0.5	16.4783	0.071555
2020	May_Week_1	3.964	32.055	16.2027	72.6785	39.5	17.6908	0.075668
2020	May_Week_2	5.467	32.802	16.9695	68.218	17.5	17.8825	0.06803
2020	May_Week_3	4.771	32.26	15.4483	75.2078	7.5	17.371	0.072746
2020	May_Week_4	6.868	32.931	18.435	65.4412	0	19.5908	0.090864
2020	June_Week_1	9.734	36.833	22.0244	59.4743	0	22.8206	0.089794
2020	June_Week_2	11.762	41.163	24.745	72.7006	56	24.7054	0.070149
2020	June_Week_3	11.859	33.347	21.8018	70.5639	0	22.7335	0.066963
2020	June_Week_4	11.713	39.442	23.0271	74.0578	10	23.8734	0.09471
2020	July_Week_1	14.699	34.053	21.0888	82.2918	44	22.5021	0.100258
2020	July_Week_2	17.133	36.048	23.3246	82.564	50.5	22.8983	0.178292
2020	July_Week_3	13.765	34.106	20.2713	82.5351	73.5	20.4596	0.181404
2020	July_Week_4	18.393	37.161	22.4513	90.2136	121	21.9706	0.160652
2020	July_Week_5	18.655	35.377	23.6464	91.4525	94.5	22.6997	0.162673
2020	August_Week_1	20.988	37.462	25.0692	90.227	82.5	24.4826	0.167843
2020	August_Week_2	22.35	37.407	27.2184	86.0395	74	25.6644	0.18298
2020	August_Week_3	20.583	40.642	26.6068	81.2307	15	25.7636	0.207132
2020	August_Week_4	20.321	41	26.8632	85.9644	16.5	25.5309	0.21661
2020	September_Week_1	14.891	33.191	22.0353	86.9991	159	22.8749	0.216272
2020	September_Week_2	14.604	30.527	20.3922	83.6463	134	20.2702	0.220678
2020	September_Week_3	9.488	31.288	18.9059	84.0772	0.5	19.2187	0.218585
2020	September_Week_4	9.438	27.609	16.2663	82.2172	3.5	16.679	0.215379
2020	October_Week_1	9.043	29.822	16.4179	83.474	0.5	16.4616	0.21299
2020	October_Week_2	3.912	23.429	13.5786	73.346	0	14.3527	0.212617
2020	October_Week_3	3.623	23.165	10.9122	82.3446	0	12.644	0.21296
2020	October_Week_4	-1.659	24.61	9.28405	74.5256	1.5	10.348	0.211656
2020	October_Week_5	-0.863	20.035	8.09258	79.0008	0.5	-	-
2020	November_Week_1	-6.213	15.942	4.48653	56.0791	0	-	-
